# Supplementary material for: Photocatalytic degradation of methyl blue dye with H2O2 sensing
Source: Royal Society of Chemistry journal article supplement (doi:10.1039/d4ra01354a), 2024-01-01
Supplement: d4ra01354a1.pdf [file d4ra01354a1.pdf]

## Supporting Information

### Photocatalytic Degradation of Methyl Blue Dye with H<sub>2</sub>O<sub>2</sub> Sensing

Priyanka Sharma,<sup>a</sup> Mainak Ganguly,<sup>\*a</sup> Mamta Sahu<sup>a</sup>

Department of Chemistry, Manipal University Jaipur, Dehmi Kalan, Jaipur 303007, India

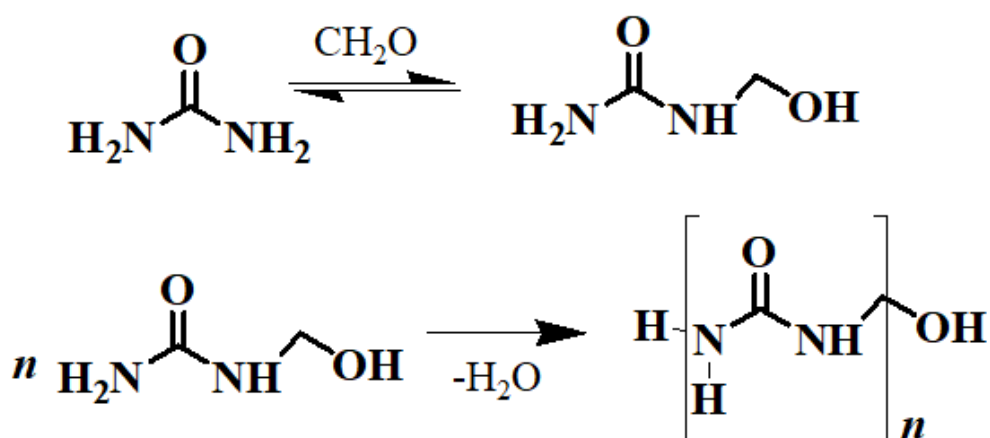

Fig. S1: Diagrammatic presentation of CP.

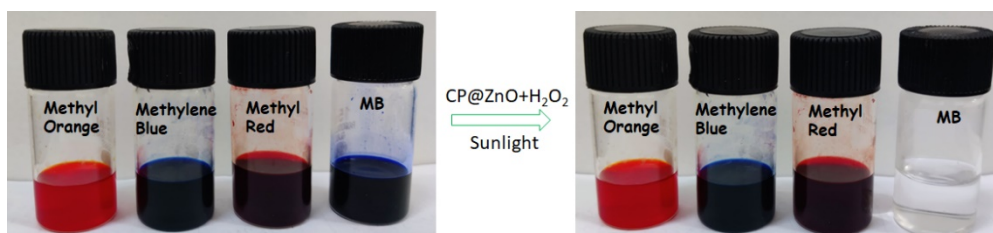

*Fig. S2: Digital images of various dyes before and after ZnO@CP/H<sub>2</sub>O<sub>2</sub>/sunlight treatment*

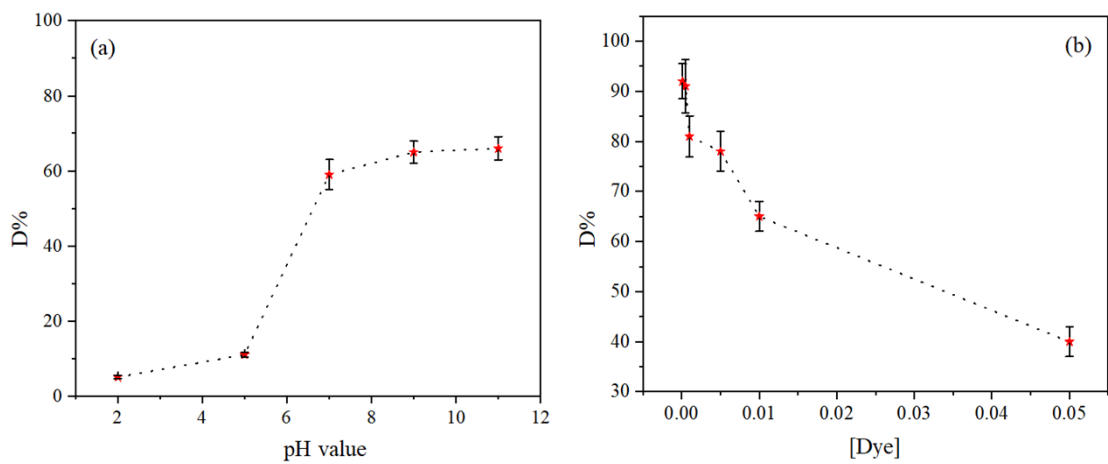

Fig. S3: D% with the variation of (a) pH and (b) initial dye concentration; ZnO@CP 0.5 g/dm<sup>3</sup>.

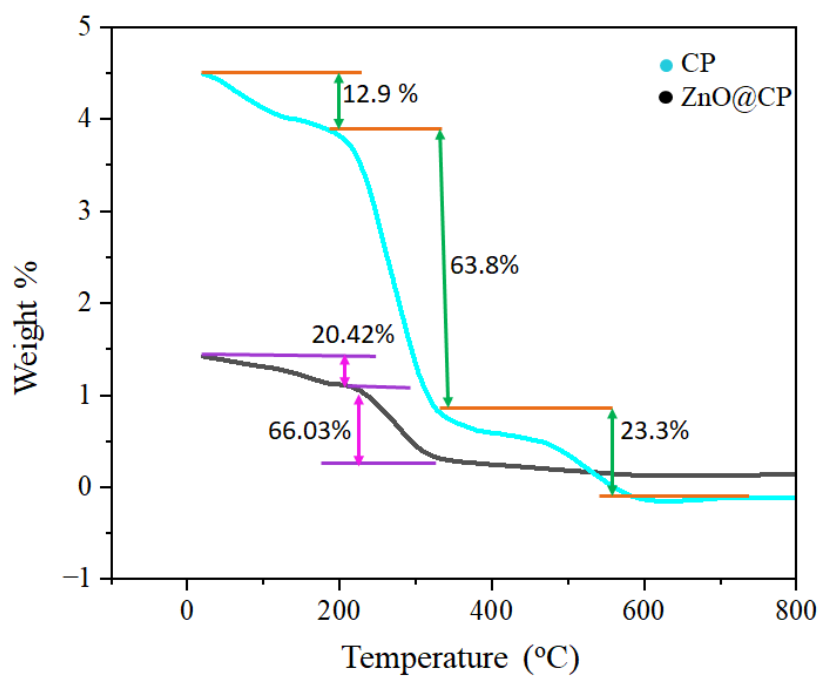

Fig. S4: TGA spectra of CP & ZnO@CP in air.

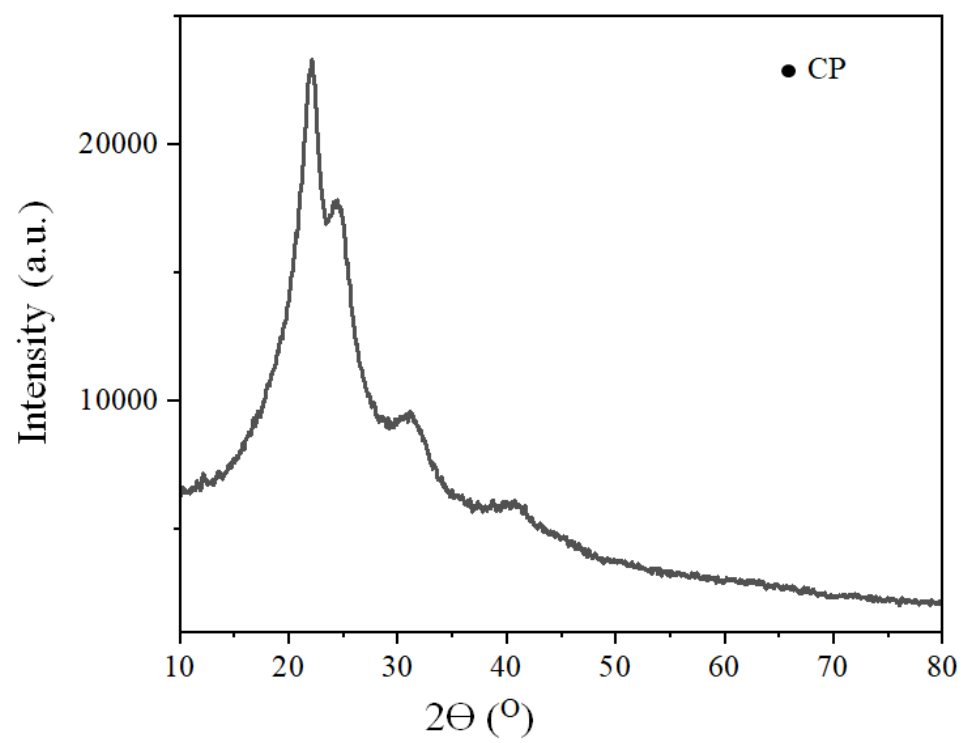

*Fig. S5: XRD plot of CP.*

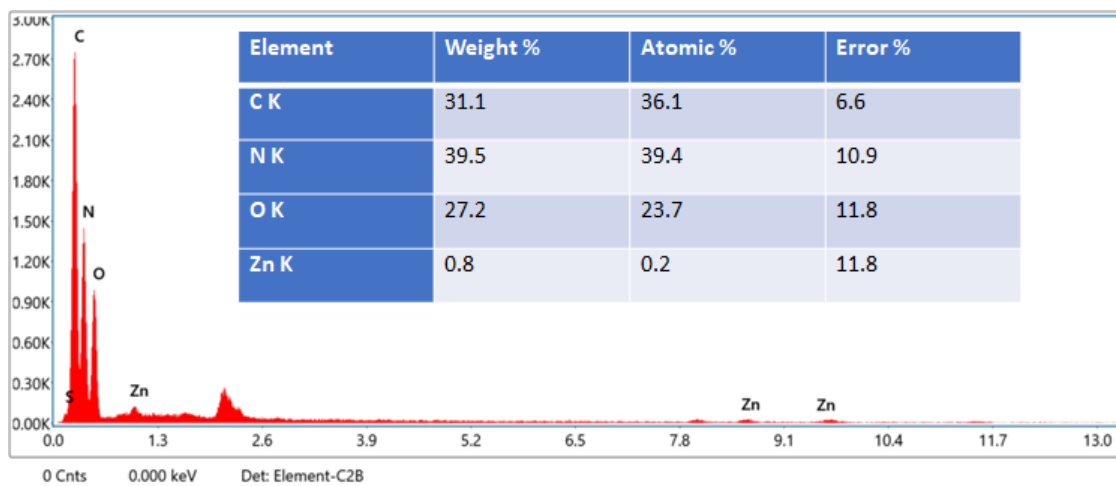

*Fig. S6: EDS spectra of ZnO@CP for the elemental analysis.*

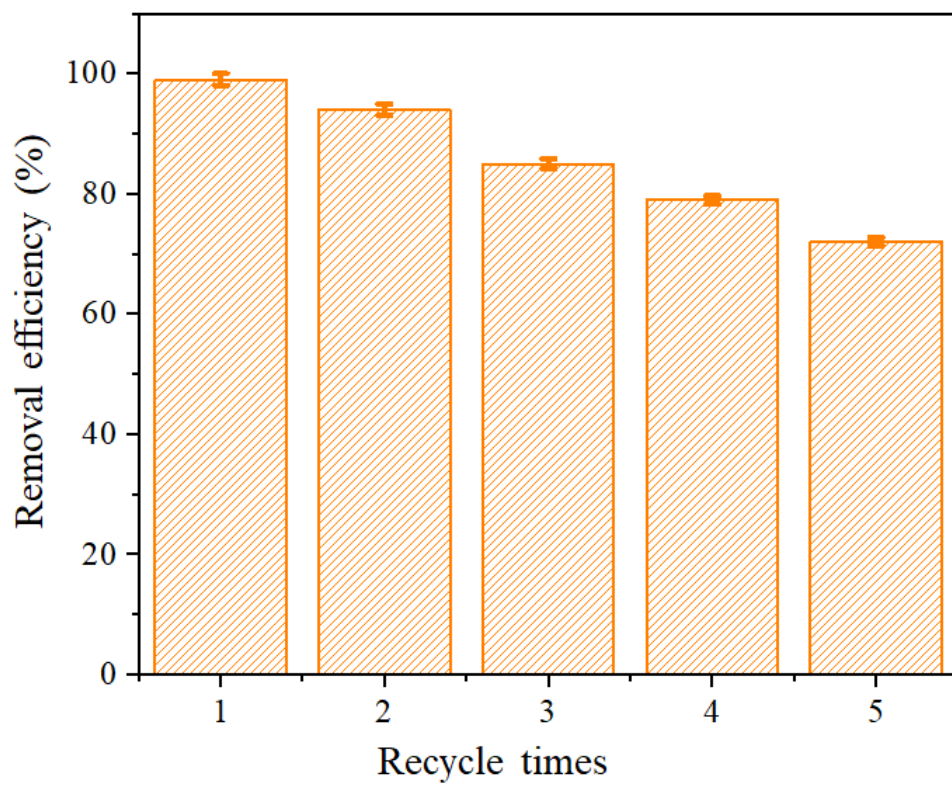

*Fig. S7: Recyclability experiment for ZnO@CP.*

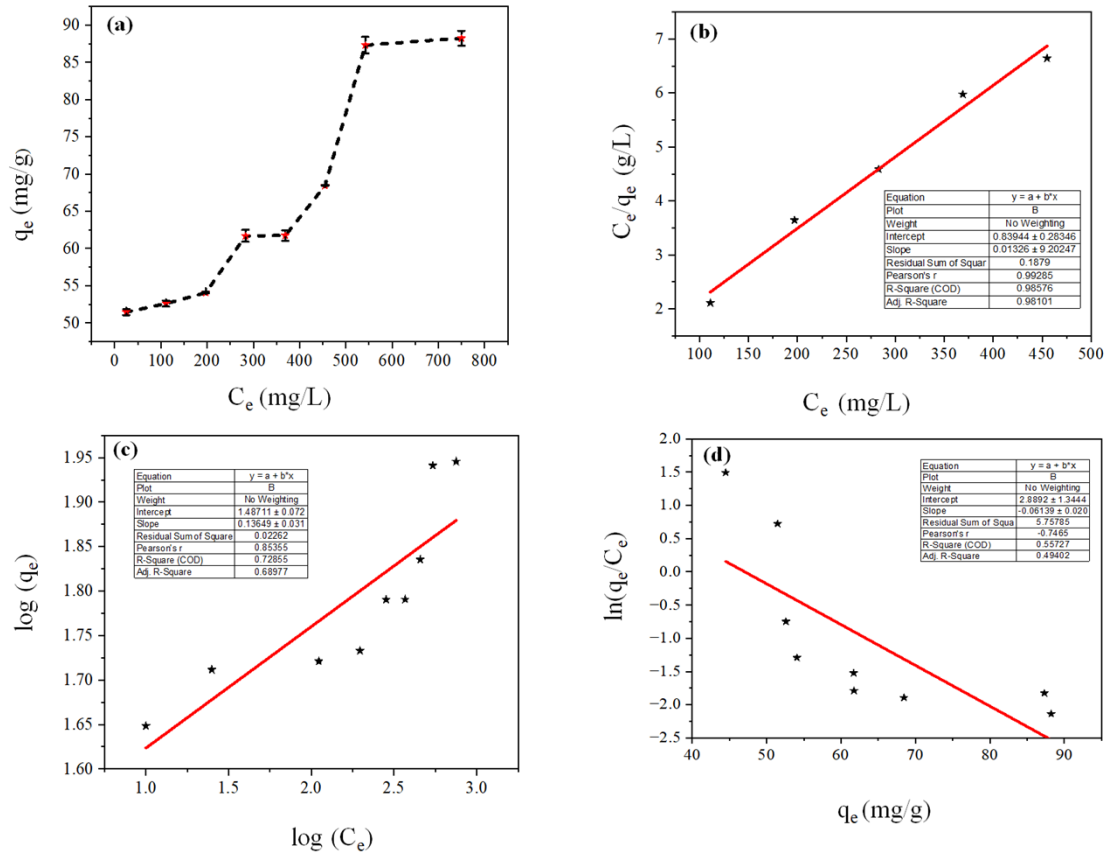

Fig. S8: (a)  $q_e$  vs.  $C_e$ , (b) Langmuir isotherm, (c) Frudlich isotherm and (d) Elovich isotherm for MB adsorption on ZnO@CP.



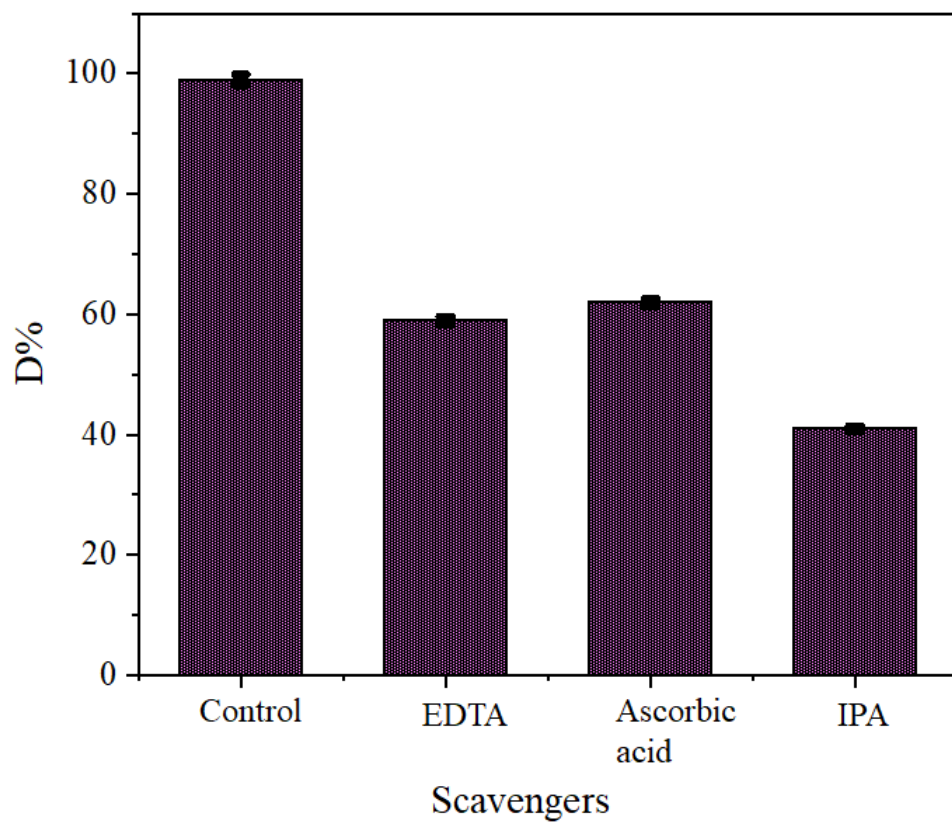

*Fig. S9: Effect of different scavengers on D% of MB dye.*

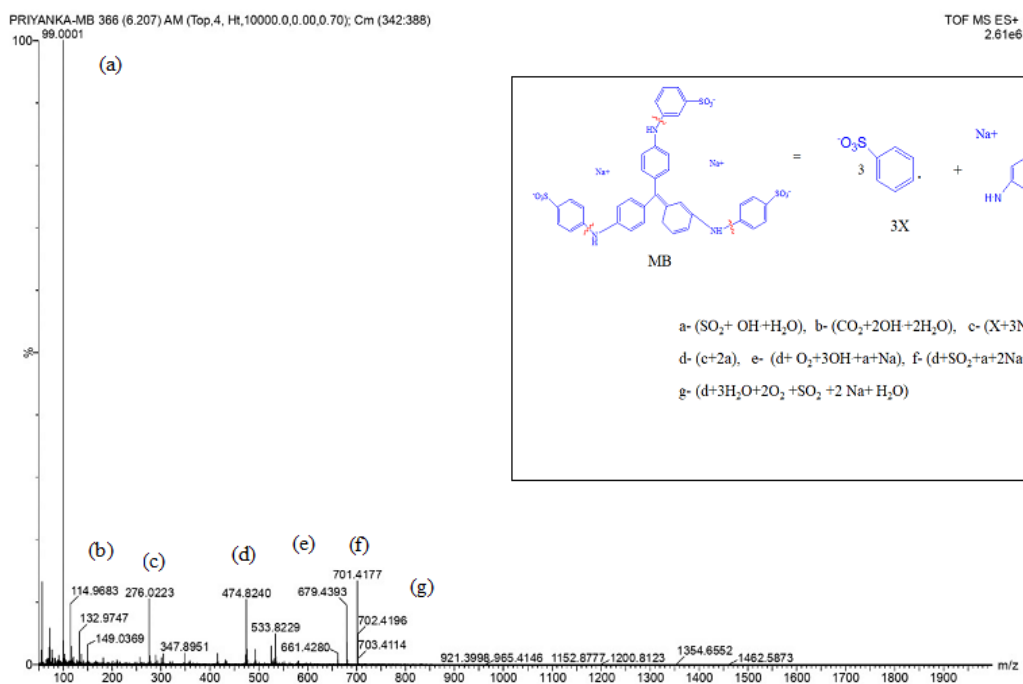

Figure S10: LCMS of MB after treating with ZnO@CP/H<sub>2</sub>O<sub>2</sub>/sunlight.

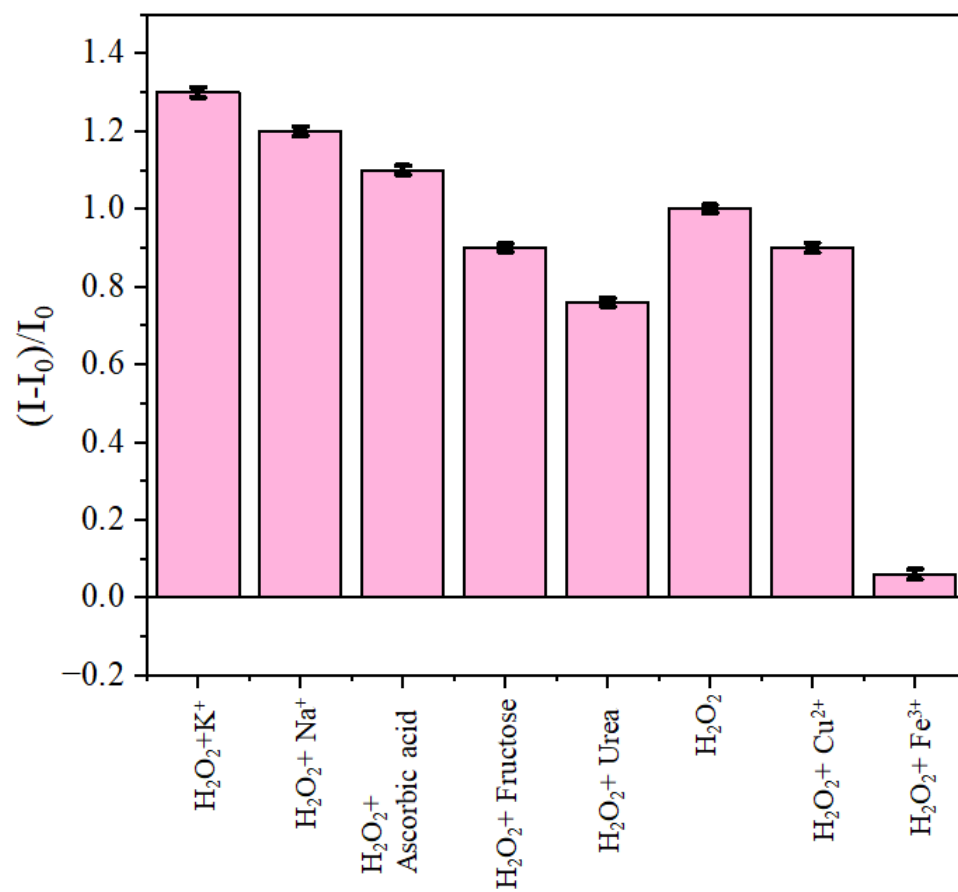

Figure S11: Change of fluorescence of H<sub>2</sub>O<sub>2</sub> induced photo degraded MB with interfering molecules.
